# Supplementary material for: Clustering datasets by complex networks analysis
Source: Springer Nature journal article supplement (doi:10.1186/2194-3206-1-5), 2013-03-13

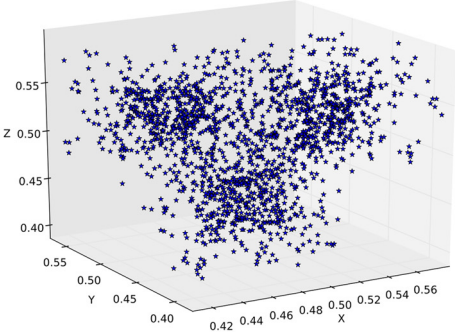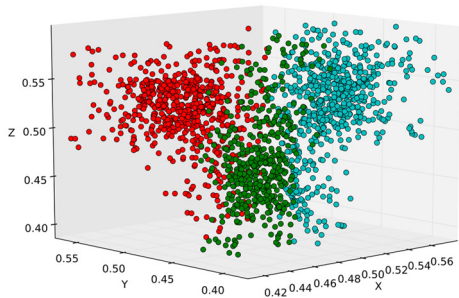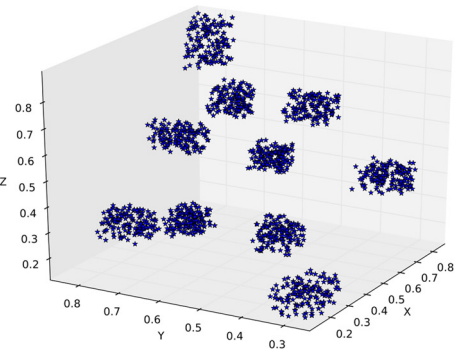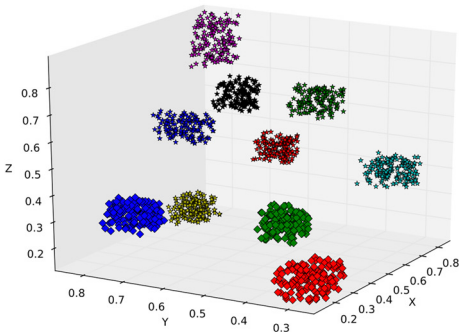

Supplement: 40294_2012_4_MOESM1_ESM.pdf [file 40294_2012_4_MOESM1_ESM.pdf]
